# Supplementary material
Source: Research Square preprint supplement (doi:10.21203/rs.3.rs-9836697/v1)
Supplement: Supplementary file 1 [file 1866c8ef8e49f15e361ad2a8.docx]

**Supplemental Table 1.** List of tissues collected from each necropsied animal. Bulls #1, #3, and #7 were necropsied at 15 days post inoculation. Bulls #5 and #6 were necropsied at 19 days post inoculation.

| Tissue # | **TISSUE** | **Bull**  **#1** | **Bull**  **#3** | **Bull**  **#5** | **Bull**  **#6** | **Bull**  **#7** |
| --- | --- | --- | --- | --- | --- | --- |
| 1 | Retropharyngeal lymph node |  |  |  |  |  |
| 2 | Nasal mucosa |  |  |  |  |  |
| 3 | Tracheobronchial lymph node |  |  |  |  |  |
| 4 | Trachea |  |  |  |  |  |
| 5 | Broncus |  |  |  |  |  |
| 6 | Brnchiole |  |  |  |  |  |
| 7 | Dorsal lung |  |  |  |  |  |
| 8 | Ventral lung |  |  |  |  |  |
| 9 | Right heart |  |  |  |  |  |
| 10 | Left heart |  |  |  |  |  |
| 11 | Interventricular septum |  |  |  |  |  |
| 12 | Rumen |  |  |  |  |  |
| 13 | Abomasum |  |  |  |  |  |
| 14 | Omasum |  |  |  |  |  |
| 15 | Reticulum |  |  |  |  |  |
| 16 | Duodenum |  |  |  |  |  |
| 17 | Pancreas |  |  |  |  |  |
| 18 | Jejunum |  |  |  |  |  |
| 19 | Distal ileum |  |  |  |  |  |
| 20 | Spiral colon |  |  |  |  |  |
| 21 | Rectum |  |  |  |  |  |
| 22 | Mesenteric lymph node | NC |  |  |  |  |
| 23 | Spleen |  |  |  |  |  |
| 24 | Liver |  |  |  |  |  |
| 25 | Left kidney |  |  |  |  |  |
| 26 | Right kidney |  |  |  |  |  |
| 27 | Inguinal lymph node |  |  |  |  |  |
| 28 | Penis proximal |  |  |  |  |  |
| 29 | Penis distal |  |  |  |  |  |
| 30 | Seminal vesicles |  |  |  |  |  |
| 31 | Prostate |  |  |  |  |  |
| 32 | Bulbourethral gland |  |  |  |  |  |
| 33 | Urinary bladder |  |  |  |  |  |
| 34 | Sciatic nerve |  |  |  |  |  |
| 35 | Skeletal muscle hind |  |  |  |  |  |
| 36 | Skeletal muscle fore |  |  |  |  |  |
| 37 | Brain |  |  |  |  |  |
| 38 | Brainstem |  |  |  |  |  |
| 39 | Eye |  |  |  |  |  |
| 40 | Larynx |  |  |  |  |  |
| 41 | Adrenal gland |  |  |  |  |  |
| 42 | Right testicle |  |  |  |  |  |
| 43 | Mediastinal lymph node |  |  |  |  |  |
| 44 | Left testicle |  |  |  |  |  |
| 45 | Right tail of epididymis |  |  |  |  |  |
| 46 | Left tail of epididymis |  |  |  |  |  |
| 47 | Right head of epididymis |  |  |  |  |  |
| 48 | Left head of epididymis |  |  |  |  |  |
| 49 | Proximal prepuce |  |  |  |  |  |
| 50 | Distal prepuce | NC | NC |  |  | NC |
| 51 | Ampulla |  |  |  |  |  |
| 52 | Pharynx |  |  | NC | NC |  |
| 53 | Perirenal lymph node | NC | NC |  |  | NC |
| 54 | Sub-illiac lymph node | NC | NC |  |  |  |

NC = not collected

An empty table cell corresponds to a collected tissue
